# Supplementary material for: The insertion reaction of acetonitrile on aryl nickel complexes stabilized by bidentate N,N′-chelating ligands
Source: Royal Society of Chemistry journal article supplement (doi:10.1039/b608352h), 2006-11-24

## Supplementary Data

# The insertion reaction of acetonitrile on aryl nickel complexes stabilized by bidentate *N, N'*-chelating ligands.

Rosa M. Ceder\*, Guillermo Muller, Matías Ordinas, Juan Ignacio Ordinas

*Departament de Química Inorgànica, Universitat de Barcelona, Martí i Franquès, 1-11, 08028 Barcelona, Spain.*

Figure 1S. MS (FAB<sup>+</sup>) of compounds **7c** and **7c'**

Figure 2S. <sup>1</sup>H NMR spectra of complexes **5a** (500 MHz), **7a** and **7c** (250 MHz).

Figure 3S. MS (CI, NH<sub>3</sub>) of imine NH=C(Mes)Me.

Scheme 1S. Alternative mechanisms proposed for the evolution of the Mesityl-nitrile cationic species.

Tables 1 and 2. <sup>1</sup>H NMR spectra of all compounds

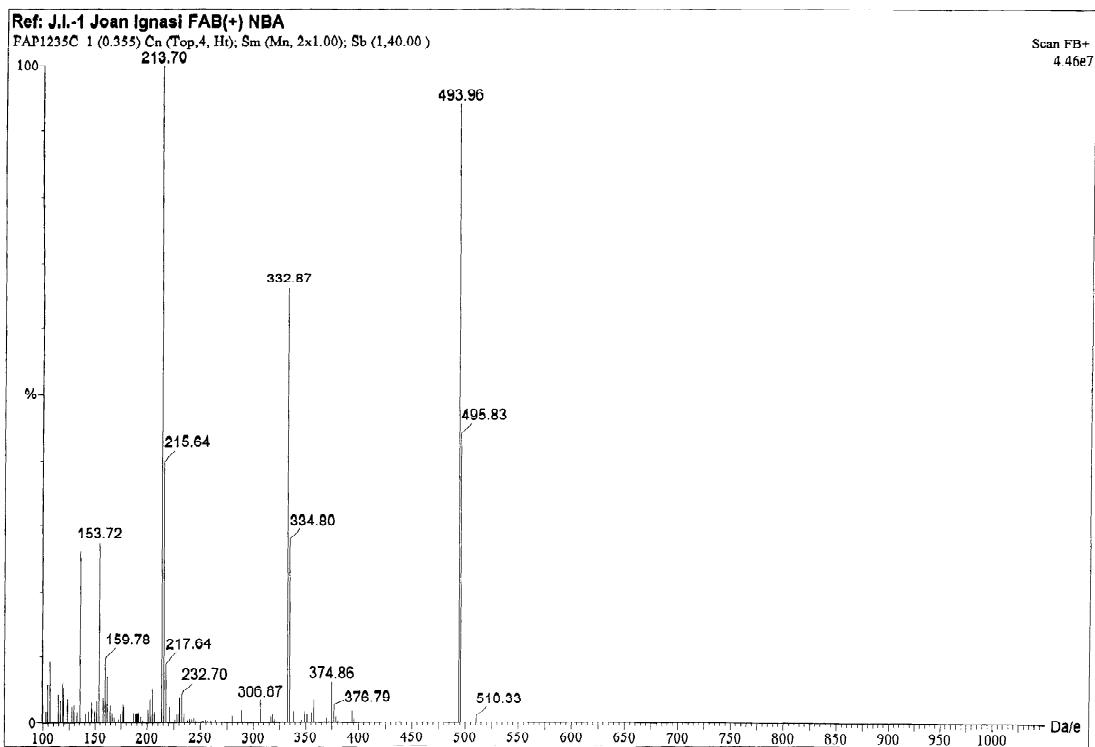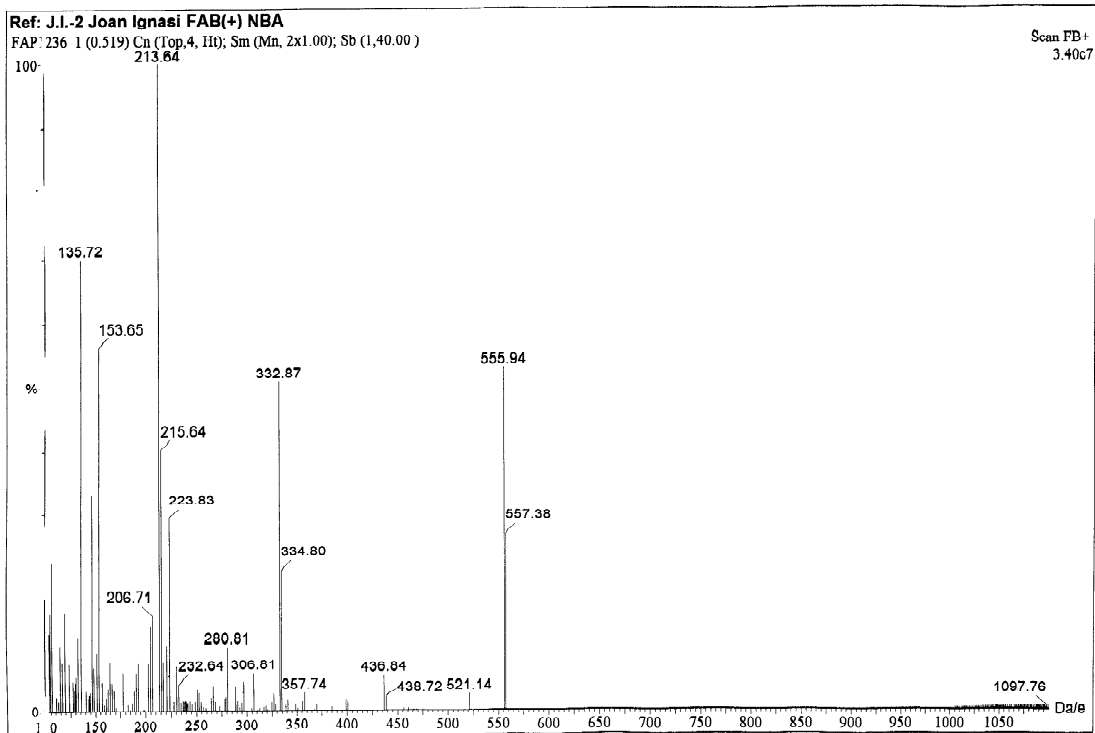

Figure 1S. MS (FAB+) of compounds 7c and 7c'

H1 / c2pu1 / INOVA-500  
CDCl3 / 25C / N reg: PCB0223  
s15 / R1 / R. Cifer  
Pulse Sequence: s2pu1

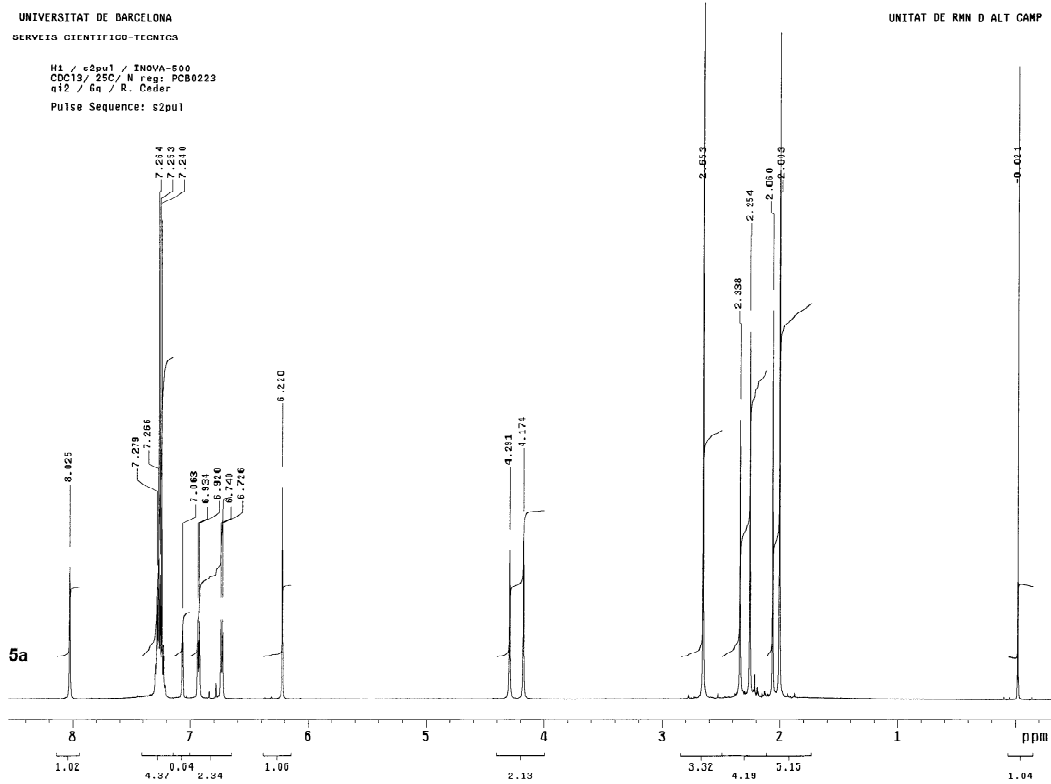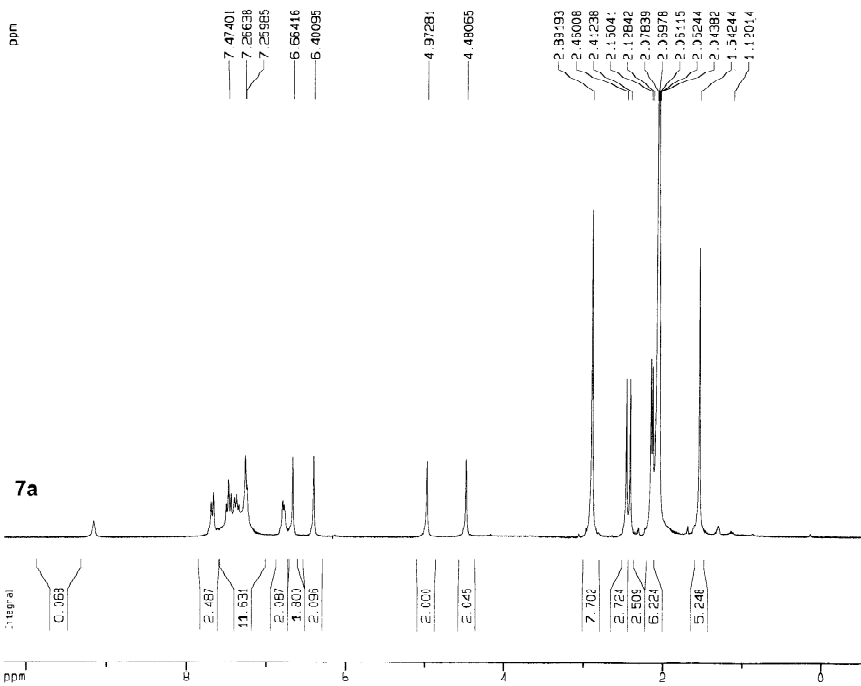

Current Data Parameters  
NAME: Multiview  
EXPNO: 1  
PROCNO: 1  
F2 - Acquisition Parameters  
Date\_: 870204  
Time: 16.37  
INSTRUM: spect  
PROBHD: 5 mm Multiview  
PULPROG: zg30  
TD: 32768  
SOLVENT: CDCl3 Acetone  
NS: 62  
DS: 0  
SWH: 5199.851 Hz  
FIDRES: 0.158340 Hz  
AQ: 3.1982069 sec  
RG: 812.7  
DW: 97.000 usec  
DE: 4.50 usec  
TE: 290.0 K  
D1: 0.1000000 sec  
D2: 19.50 usec  
DE: 4.50 usec  
RF1: 250.1315447 MHz  
NUC1: 1H  
PL1: 0.00 dB

F2 - Processing parameters  
SI: 00536  
SF: 250.1300026 MHz  
NUC1: 1H  
SSB: 0  
LB: 0.10 Hz  
GB: 0  
PC: 1.00

1D NMR plot parameters  
CX: 20.00 cm  
F1P: 10.278 ppm  
F1: 2571.17 Hz  
F2P: -0.572 ppm  
F2: 142.97 Hz  
PPHMC: 0.54255 ppm/cm  
HZCM: 135.76731 Hz/cm

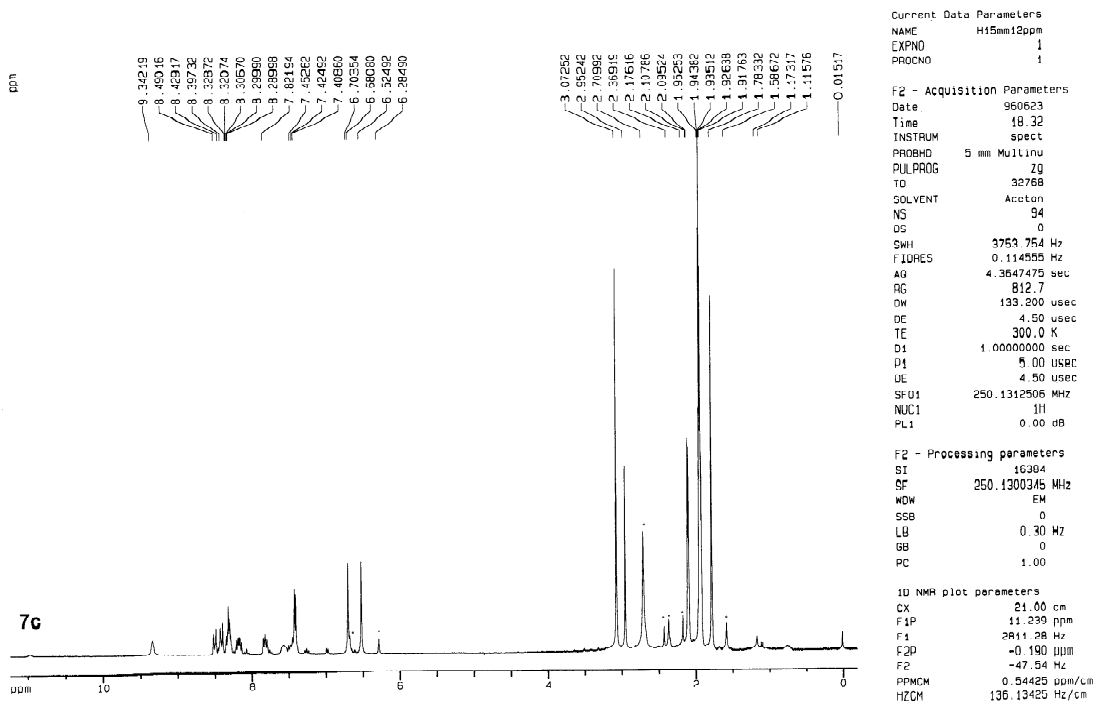

Figure 2S. Proton NMR spectra of complexes **5a** (500 MHz), **7a** and **7c** (250 MHz).

C:\Xcalibur\...Maig 2006\CI\DEPCI3545  
Ref: Imha Mes rc, Rosa Ceder DEP/CI/NH3  
DEPCI3545 #5-29 RT: 0.09-0.36 AV: 25 NL: 8.15E7  
T: + c Full ms [ 60.00-900.00]

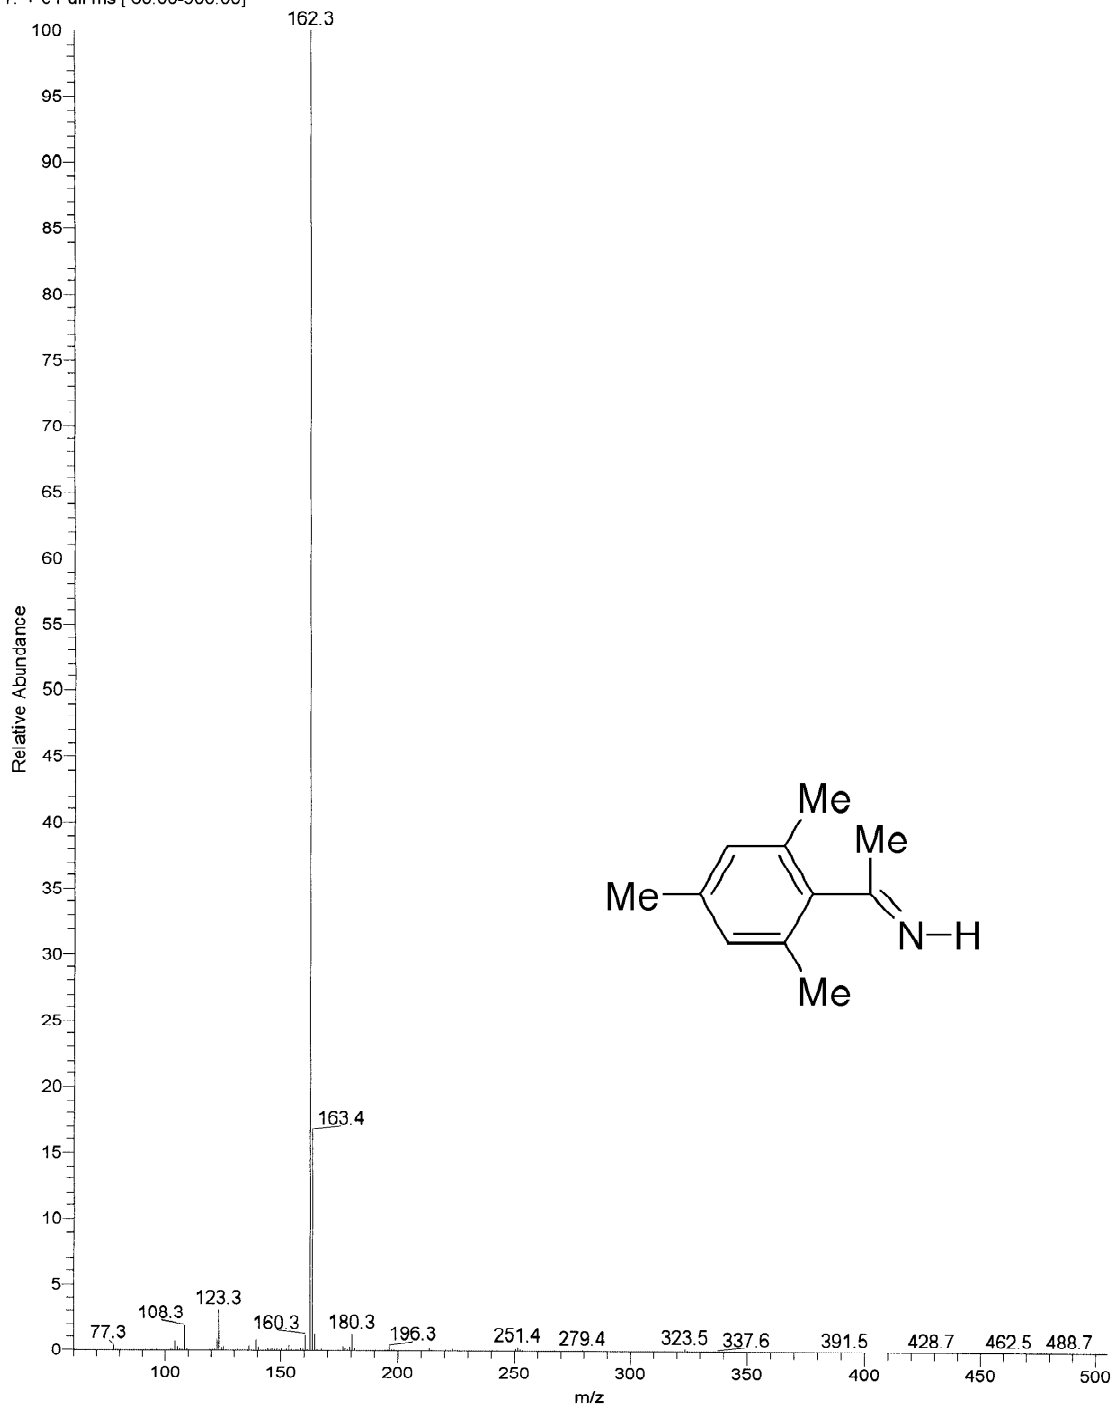

Figure 3S. MS (CI, NH<sub>3</sub>) of imine NH=C(Mes)Me.

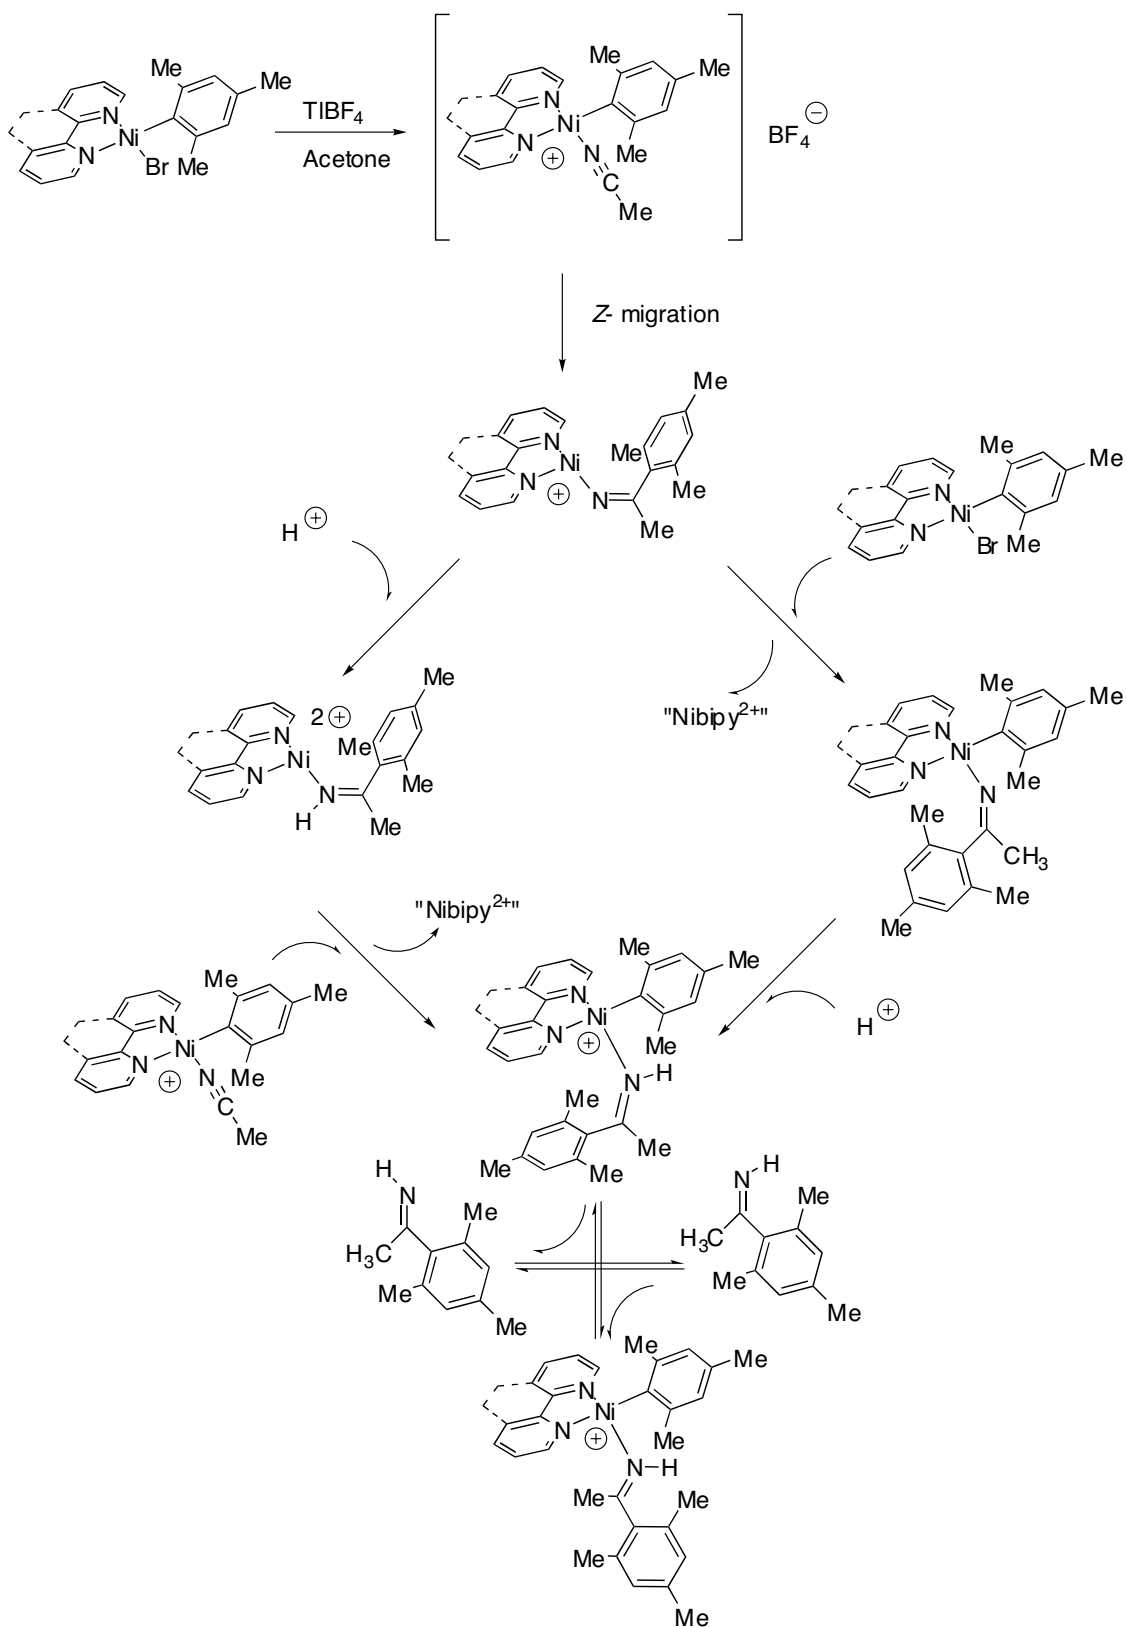

Scheme 1S. Alternative mechanisms proposed for the evolution of the Mesityl-nitrile cationic species.

Table 1  
<sup>1</sup>H NMR Data of the [MBr(Mes)PIM] and [M(3,5-lut)(Mes)PIM] complexes<sup>a)</sup>

|                                                      | PIM                                               | H <sup>5</sup> | H <sup>6</sup>                        | Mesityl                              | L(3,5-Lut or imine) |
|------------------------------------------------------|---------------------------------------------------|----------------|---------------------------------------|--------------------------------------|---------------------|
|                                                      | Aromatic                                          |                |                                       |                                      |                     |
| <b>b</b> <sup>b)</sup>                               | 8.65 (d, <i>J</i> 4.8, 1H, H <sup>1</sup> )       |                |                                       |                                      |                     |
|                                                      | 8.06 (d, <i>J</i> 8, 1H, H <sup>4</sup> )         |                |                                       |                                      |                     |
| <b>2b</b> <sup>c)</sup>                              | 7.72 (t, <i>J</i> 7.8, 1H, H <sup>3</sup> )       |                |                                       |                                      |                     |
|                                                      | 7.36-7.27 (m, 6H, H <sup>2,7,8,8',9</sup> )       | 8.49s          | 4.88s                                 |                                      |                     |
|                                                      | 9.19 (d, <i>J</i> 5.2, 1H, H <sup>1</sup> )       | 8.75s          | 5.21s                                 |                                      |                     |
|                                                      | 8.32 (t, <i>J</i> 7.5, 1H, H <sup>3</sup> )       |                |                                       |                                      |                     |
|                                                      | 8.13 (d, <i>J</i> 7.5, 1H, H <sup>4</sup> )       |                |                                       |                                      |                     |
|                                                      | 7.86 (t, <i>J</i> 5.5, 1H, H <sup>2</sup> )       |                |                                       |                                      |                     |
|                                                      | 7.50-7.30 (m, 5H, H <sup>7,7',8,8',9</sup> )      |                |                                       |                                      |                     |
|                                                      | 9.31 (d, <i>J</i> 5.5, 1H, H <sup>1</sup> )       | 8.62s          | 4.13s                                 | 6.36 (s, <i>m</i> -H)                |                     |
|                                                      | 8.18 (td, <i>J</i> 7.5, 1.5, 1H, H <sup>3</sup> ) |                |                                       | 2.87 (s, <i>o</i> -CH <sub>3</sub> ) |                     |
|                                                      | 7.96 (d, <i>J</i> 7.5, 1H, H <sup>4</sup> )       |                |                                       | 2.17 (s, <i>p</i> -CH <sub>3</sub> ) |                     |
| 7.82 (t, <i>J</i> 7.5, 1H, H <sup>2</sup> )          |                                                   |                |                                       |                                      |                     |
| 7.38-7.24* (m, 3H, H <sup>8,8',9</sup> )             |                                                   |                |                                       |                                      |                     |
| 6.85 (d, <i>J</i> 7.5, 2H, H <sup>7,7'</sup> )       |                                                   |                |                                       |                                      |                     |
| 8.12 (td, <i>J</i> 7.5, 1.5, 1H, H <sup>3</sup> )    | 8.58s                                             | 5.19s          | 6.43 (s, <i>m</i> -H)                 |                                      |                     |
| 7.85 (d, <i>J</i> 7.5, 1H, H <sup>4</sup> )          |                                                   |                | 2.96 (s, <i>o</i> -CH <sub>3</sub> )  |                                      |                     |
| 7.67 (d, <i>J</i> 7.5, 2H, H <sup>7,7'</sup> )       |                                                   |                | 2.04 (s, <i>p</i> -CH <sub>3</sub> )  |                                      |                     |
| 7.44 (t, <i>J</i> 7, 1H, H <sup>2</sup> )            |                                                   |                |                                       |                                      |                     |
| 7.40 (d, <i>J</i> 7.5, 2H, H <sup>8,8'</sup> )       |                                                   |                |                                       |                                      |                     |
| 7.38-7.24* (m, 1H, H <sup>9</sup> )                  |                                                   |                |                                       |                                      |                     |
| 7.15 (d, <i>J</i> 5.5, 1H, H <sup>1</sup> )          |                                                   |                |                                       |                                      |                     |
| 9.13 (d, <i>J</i> 5.5, 1H, H <sup>1</sup> )          | 8.88t                                             | 4.49s          | 6.45 (s, <i>m</i> -H)                 |                                      |                     |
| 8.26 (td, <i>J</i> 8.2, 1H, H <sup>3</sup> )         |                                                   |                | 2.42 (s, <i>o</i> -CH <sub>3</sub> )  |                                      |                     |
| 8.12 (d, <i>J</i> 8.0, 1H, H <sup>4</sup> )          |                                                   |                | 2.02* (s, <i>p</i> -CH <sub>3</sub> ) |                                      |                     |
| 7.87 (dd, <i>J</i> 5, 1.5, 1H, H <sup>2</sup> )      |                                                   |                |                                       |                                      |                     |
| 7.28 (tt, <i>J</i> 7.5, 1.5, 1H, H <sup>9</sup> )    |                                                   |                |                                       |                                      |                     |
| 7.22 (tt, <i>J</i> 7.5, 1.5, 2H, H <sup>8,8'</sup> ) |                                                   |                |                                       |                                      |                     |
| 6.80 (d, <i>J</i> 7.0, 2H, H <sup>7,7'</sup> )       |                                                   |                |                                       |                                      |                     |
| 8.21 (td, <i>J</i> 7.5, 2, 1H, H <sup>3</sup> )      | 8.69t                                             | 5.23s          | 6.55 (s, <i>m</i> -H)                 |                                      |                     |
| 8.04 (d, 1H, H <sup>4</sup> )                        |                                                   |                | 2.57 (s, <i>o</i> -CH <sub>3</sub> )  |                                      |                     |
| 7.70 (d, <i>J</i> 7.5, 2H, H <sup>7,7'</sup> )       |                                                   |                | 2.02* (s, <i>p</i> -CH <sub>3</sub> ) |                                      |                     |
| <b>4b</b> ( <i>cis</i> )                             |                                                   |                |                                       |                                      |                     |
|                                                      |                                                   |                |                                       |                                      |                     |
| <b>4b</b> ( <i>trans</i> )                           |                                                   |                |                                       |                                      |                     |
|                                                      |                                                   |                |                                       |                                      |                     |

|                                                         |                                                    |       |                       |                       |                                      |                                      |                                       |       |                       |                       |                                      |                                      |
|---------------------------------------------------------|----------------------------------------------------|-------|-----------------------|-----------------------|--------------------------------------|--------------------------------------|---------------------------------------|-------|-----------------------|-----------------------|--------------------------------------|--------------------------------------|
| <b>5b(cis)</b>                                          | 7.59 (dd, <i>J</i> 5.5, 1.5, 1H, H <sup>2</sup> )  | 8.68s | 4.23s                 | 6.45 (s, <i>m</i> -H) | 8.76 (s, <i>o</i> -H)                |                                      |                                       |       |                       |                       |                                      |                                      |
|                                                         | 7.46 (dd, <i>J</i> 5.5, 1.5, 1H, H <sup>1</sup> )  |       |                       |                       |                                      | 3.01 (s, <i>o</i> -CH <sub>3</sub> ) |                                       |       |                       |                       |                                      |                                      |
|                                                         | 7.40 (tt, <i>J</i> 7, 1.5, 2H, H <sup>8,8'</sup> ) |       |                       |                       |                                      |                                      | 2.16* (s, <i>p</i> -CH <sub>3</sub> ) |       |                       |                       |                                      |                                      |
|                                                         | 7.33 (tt, <i>J</i> 7.5, 1.5, 1H, H <sup>9</sup> )  |       |                       |                       |                                      |                                      |                                       |       |                       |                       |                                      |                                      |
|                                                         | 8.30 (d, <i>J</i> 8, 1H, H <sup>3</sup> )          |       |                       |                       |                                      |                                      |                                       |       |                       |                       |                                      |                                      |
|                                                         | 8.19 (d, <i>J</i> 7.5, 1H, H <sup>4</sup> )        |       |                       |                       |                                      |                                      |                                       |       |                       |                       |                                      |                                      |
|                                                         | 7.74 (dd, <i>J</i> 5.5, 1.5, 1H, H <sup>2</sup> )  |       |                       |                       |                                      |                                      |                                       |       |                       |                       |                                      |                                      |
|                                                         | 7.34-7.33* (m, 3H, H <sup>8,8',9</sup> )           |       |                       |                       |                                      |                                      |                                       |       |                       |                       |                                      |                                      |
|                                                         | 7.18 (d, <i>J</i> 5, 1H, H <sup>1</sup> )          |       |                       |                       |                                      |                                      |                                       |       |                       |                       |                                      |                                      |
|                                                         | 6.86 (d, <i>J</i> 7.5, 2H, H <sup>7,7'</sup> )     |       |                       |                       |                                      |                                      |                                       |       |                       |                       |                                      |                                      |
| 8.30 (d, <i>J</i> 7, 1H, H <sup>3</sup> )               | 8.97s                                              | 4.67s | 6.49 (s, <i>m</i> -H) | 8.32 (s, <i>o</i> -H) |                                      |                                      |                                       |       |                       |                       |                                      |                                      |
| 8.16 (d, <i>J</i> 7, 1H, H <sup>4</sup> )               |                                                    |       |                       |                       | 3.06 (s, <i>o</i> -CH <sub>3</sub> ) |                                      |                                       |       |                       |                       |                                      |                                      |
| 7.61 (dd, <i>J</i> 5.5, 1.5, 1H, H <sup>2</sup> )       |                                                    |       |                       |                       |                                      | 2.12 (s, <i>p</i> -CH <sub>3</sub> ) |                                       |       |                       |                       |                                      |                                      |
| 7.33-7.34* (m, 3H, H <sup>8,8',9</sup> )                |                                                    |       |                       |                       |                                      |                                      |                                       |       |                       |                       |                                      |                                      |
| 7.26 (d, <i>J</i> 5.5, 1H, H <sup>1</sup> )             |                                                    |       |                       |                       |                                      |                                      |                                       |       |                       |                       |                                      |                                      |
| 7.06-7.07 (m, 2H, H <sup>7,7'</sup> )                   |                                                    |       |                       |                       |                                      |                                      |                                       |       |                       |                       |                                      |                                      |
| 8.39 (dd, <i>J</i> 8.0, 2.0, 1H, H <sup>3</sup> )       |                                                    |       |                       |                       |                                      |                                      | 9.05s                                 | 4.60s | 6.53 (s, <i>m</i> -H) | 8.49 (s, <i>o</i> -H) |                                      |                                      |
| 8.33 (d, <i>J</i> 7.5, 1H, H <sup>4</sup> )             |                                                    |       |                       |                       |                                      |                                      |                                       |       |                       |                       | 2.51 (s, <i>o</i> -CH <sub>3</sub> ) |                                      |
| 7.98 (d, <i>J</i> 5, 1H, H <sup>1</sup> )               |                                                    |       |                       |                       |                                      |                                      |                                       |       |                       |                       |                                      | 2.20 (s, <i>p</i> -CH <sub>3</sub> ) |
| 7.85 (ddd, <i>J</i> 7.5, 5.0, 1.5, 1H, H <sup>2</sup> ) |                                                    |       |                       |                       |                                      |                                      |                                       |       |                       |                       |                                      |                                      |
| 7.31 (t, <i>J</i> 7.5, 1H, H <sup>9</sup> )             |                                                    |       |                       |                       |                                      |                                      |                                       |       |                       |                       |                                      |                                      |
| 7.24 (t, <i>J</i> 5.0, 2H, H <sup>8,8'</sup> )          |                                                    |       |                       |                       |                                      |                                      |                                       |       |                       |                       |                                      |                                      |
| 6.78 (d, <i>J</i> 7.5, 2H, H <sup>7,7'</sup> )          |                                                    |       |                       |                       |                                      |                                      |                                       |       |                       |                       |                                      |                                      |
| 8.40 (dd, <i>J</i> 8.0, 1.5, 1H, H <sup>3</sup> )       | 9.08s                                              | 5.01s | 6.58 (s, <i>m</i> -H) | 8.10 (s, <i>o</i> -H) |                                      |                                      |                                       |       |                       |                       |                                      |                                      |
| 8.31 (d, <i>J</i> 6.5, 1H, H <sup>4</sup> )             |                                                    |       |                       |                       | 2.68 (s, <i>o</i> -CH <sub>3</sub> ) |                                      |                                       |       |                       |                       |                                      |                                      |
| 7.73 (ddd, 1H, H <sup>2</sup> )                         |                                                    |       |                       |                       |                                      | 2.15 (s, <i>p</i> -CH <sub>3</sub> ) |                                       |       |                       |                       |                                      |                                      |
| 7.64 (d, <i>J</i> 5.5, 1H, H <sup>1</sup> )             |                                                    |       |                       |                       |                                      |                                      |                                       |       |                       |                       |                                      |                                      |
| 7.31-7.23* (m, 3H, H <sup>8,8',9</sup> )                |                                                    |       |                       |                       |                                      |                                      |                                       |       |                       |                       |                                      |                                      |
| 7.02 (d, <i>J</i> 7.0, 2H, H <sup>7,7'</sup> )          |                                                    |       |                       |                       |                                      |                                      |                                       |       |                       |                       |                                      |                                      |
| 7.21-7.80 (m, 7H)                                       |                                                    |       |                       |                       |                                      |                                      | 8.68s                                 | 4.84s | 6.55 (s, <i>m</i> -H) | 10.33 (s, NH)         |                                      |                                      |
| 6.77 (bs, 2H, H <sup>1</sup> )                          |                                                    |       |                       |                       |                                      |                                      |                                       |       |                       |                       | 3.00 (s, <i>o</i> -CH <sub>3</sub> ) |                                      |
|                                                         |                                                    |       |                       |                       |                                      |                                      |                                       |       |                       |                       |                                      | 2.20 (s, <i>p</i> -CH <sub>3</sub> ) |
|                                                         |                                                    |       |                       |                       |                                      |                                      |                                       |       |                       |                       |                                      |                                      |
|                                                         |                                                    |       |                       |                       |                                      |                                      |                                       |       |                       |                       |                                      |                                      |
|                                                         |                                                    |       |                       |                       |                                      |                                      |                                       |       |                       |                       |                                      |                                      |
|                                                         |                                                    |       |                       |                       |                                      |                                      |                                       |       |                       |                       |                                      |                                      |
|                                                         |                                                    |       |                       |                       |                                      |                                      |                                       |       |                       |                       |                                      |                                      |
|                                                         |                                                    |       |                       |                       |                                      |                                      |                                       |       |                       |                       |                                      |                                      |

a) Recorded at 500 MHz in acetone-d<sub>6</sub>, unless noted otherwise. *J* in Hz, positions and splitting pattern of the peaks with asterisks are not determined precisely due to overlapping with other signals. Numbering is given in the diagram at the top of the table. b) 200 MHz, CDCl<sub>3</sub>



c) 250 MHz, DMSO-d<sup>6</sup>. d) 500MHz, CDCl<sub>3</sub>

For the Neutral and Ionic complexes, Trans : Trans configuration between the mesityl and the iminic nitrogen, Cis : Cis configuration between the mesityl and the iminic nitrogen.

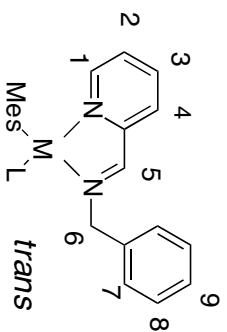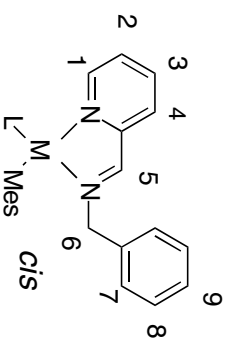

L = Br ,

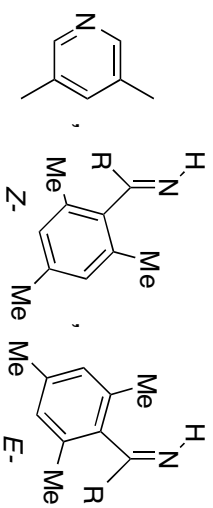

Table 2  
<sup>1</sup>H NMR Data of the [MBr(R)NN], [M(R)(3,5-lut)NN] and [Ni(Mes)<sub>2</sub>{E-(NH=C(R)(Mes))NN}]BF<sub>4</sub> complexes where NN = DAD, 2,2'-bipy or *o*-phen and R = Me<sup>s(a)</sup>

|                          | Aromatic                                         | NN | H <sup>1</sup> | H <sup>7</sup> | H <sup>5</sup> | H <sup>6</sup> | R(Mes)                               | L(3,5-lutidine or imine) |
|--------------------------|--------------------------------------------------|----|----------------|----------------|----------------|----------------|--------------------------------------|--------------------------|
| <b>2a</b> <sup>(b)</sup> | 7.25-7.45 (m, 10H)                               |    | 4.70s          |                | 2.25s          |                |                                      |                          |
| <b>2a</b> <sup>(b)</sup> | 7.57 (d, <i>J</i> 7.4H, H <sup>2,2',8,8'</sup> ) |    | 5.63s          |                | 2.27s          |                |                                      |                          |
|                          | 7.40-7.28 (m, 6H)                                |    |                |                |                |                |                                      |                          |
| <b>3a</b> <sup>(b)</sup> | 7.65 (d, <i>J</i> 6.8, 2H, H <sup>8,8'</sup> )   |    | 4.29s          | 5.37s          | 1.91s          | 2.16s          | 6.33 (s, <i>m</i> -H)                |                          |
|                          | 7.21-7.38 (m, 6H)                                |    |                |                |                |                | 2.75 (s, <i>o</i> -CH <sub>3</sub> ) |                          |
|                          | 6.68 (bs, 2H, H <sup>2,2'</sup> )                |    |                |                |                |                | 1.69 (s, <i>p</i> -CH <sub>3</sub> ) |                          |
| <b>3c</b>                | 9.52 (d, <i>J</i> 6, 2H, H <sup>8</sup> )        |    |                |                |                |                | 6.53 (s, <i>m</i> -H)                |                          |
|                          | 7.95 (t, <i>J</i> 6, 2H, H <sup>6</sup> )        |    |                |                |                |                | 3.10 (s, <i>o</i> -CH <sub>3</sub> ) |                          |
|                          | 7.9-7.8(m, 4H, H <sup>5,4,3</sup> )              |    |                |                |                |                | 2.23 (s, <i>p</i> -CH <sub>3</sub> ) |                          |
|                          | 7.50 (t, <i>J</i> 6, 2H, H <sup>7</sup> )        |    |                |                |                |                |                                      |                          |
|                          | 7.29 (d, <i>J</i> 6, 2H, H <sup>1</sup> )        |    |                |                |                |                |                                      |                          |
|                          | 7.14 (t, 2H, H <sup>2</sup> )                    |    |                |                |                |                |                                      |                          |
| <b>3d</b>                | 9.71 (d, <i>J</i> 8 1H, H <sup>8</sup> )         |    |                |                |                |                | 6.59 (s, <i>m</i> -H)                |                          |
|                          | 8.43 (m, 1H, H <sup>6</sup> )                    |    |                |                |                |                | 3.15 (s, <i>o</i> -CH <sub>3</sub> ) |                          |
|                          | 8.36 (t, 1H, H <sup>3</sup> )                    |    |                |                |                |                | 2.27 (s, <i>p</i> -CH <sub>3</sub> ) |                          |
|                          | 7.95-7.85 (m, 2H, H <sup>4,5</sup> )             |    |                |                |                |                |                                      |                          |

|                            |                                                |       |       |       |       |                                      |                                      |
|----------------------------|------------------------------------------------|-------|-------|-------|-------|--------------------------------------|--------------------------------------|
|                            | 7.82 (m, 1H, H <sup>7</sup> )                  |       |       |       |       |                                      |                                      |
|                            | 7.46 (m, 1H, H <sup>2</sup> )                  |       |       |       |       |                                      |                                      |
| <b>4a</b>                  | 7.63 (d, <i>J</i> 7.5, 2H, H <sup>8,8'</sup> ) | 4.51s | 5.34s | 2.10s | 2.17s | 6.40 (s, <i>m</i> -H)                |                                      |
|                            | 7.36-7.17 (several m, 6H)                      |       |       |       |       | 2.40 (s, <i>o</i> -CH <sub>3</sub> ) |                                      |
|                            | 6.65 (d, <i>J</i> 7.5, 2H, H <sup>2,2'</sup> ) |       |       |       |       | 2.15 (s, <i>p</i> -CH <sub>3</sub> ) |                                      |
| <b>5a</b>                  | 7.40-7.22 (m, 6H)                              | 4.17  | 4.29s | 2.25s | 2.34s | 6.22 (s, <i>m</i> -H)                | 8.02 (s, <i>o</i> -H)                |
|                            | 6.93 (d, <i>J</i> 7, 2H, H <sup>8,8'</sup> )   |       |       |       |       | 2.65 (s, <i>o</i> -CH <sub>3</sub> ) | 7.06 (s, <i>p</i> -H)                |
| CH <sub>3</sub> )          | 6.73 (d, <i>J</i> 7, 2H, H <sup>2,2'</sup> )   |       |       |       |       | 2.06 (s, <i>p</i> -CH <sub>3</sub> ) | 2.03 (s, <i>m</i> -                  |
| <b>6a</b> <sup>b)</sup>    | 7.32-7.16 (m, 6H)                              | 4.51s | 4.74s | 2.32s |       | 6.34 (s, <i>m</i> -H)                | 7.78 (s, <i>o</i> -H)                |
|                            | 6.88 (m, 2H, H <sup>8,8'</sup> )               |       |       |       |       | 2.47 (s, <i>o</i> -CH <sub>3</sub> ) | 7.14 (s, <i>p</i> -H)                |
| CH <sub>3</sub> )          | 6.71 (m, 2H, H <sup>2,2'</sup> )               |       |       |       |       | 2.11 (s, <i>p</i> -CH <sub>3</sub> ) | 2.04 (s, <i>m</i> -                  |
| <b>7a(E)</b> <sup>c)</sup> | 7.70-7.25 (m, 8H)                              | 4.48s | 4.97s | 2.13s | 2.15s | 6.40 (s, <i>m</i> -H)                | 9.16 (s, NH)                         |
|                            | 6.78 (m, 2H, H <sup>2,2'</sup> )               |       |       |       |       | 2.89 (s, <i>o</i> -CH <sub>3</sub> ) | 6.66 (s, <i>m</i> -H)                |
|                            | N=CCH <sub>3</sub> )                           |       |       |       |       | 1.54 (s, <i>p</i> -CH <sub>3</sub> ) | 2.89 (s,                             |
| CH <sub>3</sub> )          |                                                |       |       |       |       |                                      | 2.41 (s, 3H, <i>o</i> -              |
| CH <sub>3</sub> )          |                                                |       |       |       |       |                                      | 2.46 (s, 3H, <i>o</i> -              |
|                            |                                                |       |       |       |       |                                      | 1.54 (s, <i>p</i> -CH <sub>3</sub> ) |
| <b>7c(E)</b> <sup>c)</sup> | 8.50 (d, 1H)                                   |       |       |       |       | 6.81 (s, <i>m</i> -H)                | 9.45 (s, NH)                         |
|                            | 8.41 (d, 1H)                                   |       |       |       |       | 3.18 (s, <i>o</i> -CH <sub>3</sub> ) | 6.63 (s, <i>m</i> -H)                |

|                             |                                |  |                                      |                                      |
|-----------------------------|--------------------------------|--|--------------------------------------|--------------------------------------|
|                             | 8.32(m, 2H)                    |  | 3.06 (s, <i>p</i> -CH <sub>3</sub> ) | 2.22 (s,                             |
| N=CCH <sub>3</sub> )        | 8.20 (dd, 1H)                  |  |                                      | 2.21 (s, <i>p</i> -CH <sub>3</sub> ) |
|                             | 7.82 (dd, 1H)                  |  |                                      | 1.89 (s, <i>o</i> -CH <sub>3</sub> ) |
|                             | 7.42 (d, 2H)                   |  |                                      |                                      |
| <b>7c'(E)</b> <sup>c)</sup> | 8.62-8.22 (m, 5H)              |  | 6.88 (s, <i>m</i> -H)                | 9.83 (s, NH)                         |
|                             | 7.70-7.40 (m, 3H)              |  | 2.81 (s, <i>o</i> -CH <sub>3</sub> ) | 7.50 (m, 5H)                         |
| Ph)                         |                                |  | 2.60 (s, <i>p</i> -CH <sub>3</sub> ) | 6.52 (s, <i>m</i> -H)                |
|                             |                                |  |                                      | 2.26 (s, <i>o</i> -CH <sub>3</sub> ) |
|                             |                                |  |                                      | 2.17 (s, <i>p</i> -CH <sub>3</sub> ) |
| <b>7d(E)</b> <sup>c)</sup>  | 9.00 (dd, 1H)                  |  | 6.84 (s, <i>m</i> -H)                | 9.57 (s, NH)                         |
|                             | 8.88 (dd, 1H)                  |  | 3.23 (s, <i>o</i> -CH <sub>3</sub> ) | 6.67 (s, <i>m</i> -H)                |
|                             | 8.79 (dd, 1H)                  |  | 3.14 (s, <i>p</i> -CH <sub>3</sub> ) | 2.24 (s,                             |
| N=CCH <sub>3</sub> )        | 8.31 (d, 2H, H <sup>s4</sup> ) |  |                                      | 2.22 (s, <i>p</i> -CH <sub>3</sub> ) |
|                             | 8.25 (dd, 1H)                  |  |                                      | 2.02 (s, <i>o</i> -CH <sub>3</sub> ) |
|                             | 7.86 (dd, 1H)                  |  |                                      |                                      |
|                             | 7.78 (dd, 1H)                  |  |                                      |                                      |

a) Recorded at 500 MHz in CDCl<sub>3</sub>, unless noted otherwise, J in Hz. b) Recorded at 250MHz in CDCl<sub>3</sub>. c) Recorded at 250 MHz in acetone-d<sup>6</sup>

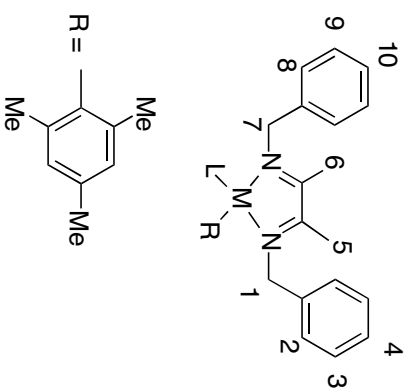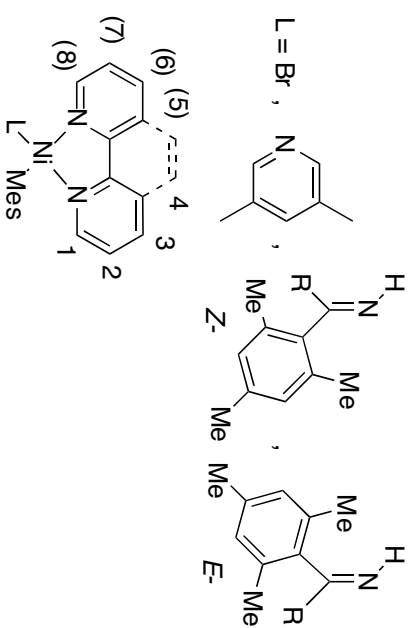

Supplement: b608352h.pdf [file b608352h.pdf]
